# Supplementary material
Source: Springer Nature journal article supplement (https://www.springermedizin.de/resource/supplementary/12967_2011_717_MOESM1_ESM.pdf/9577382)

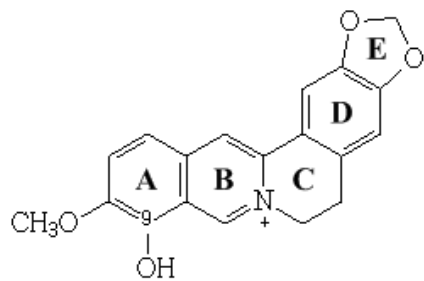

M1: berberrubine

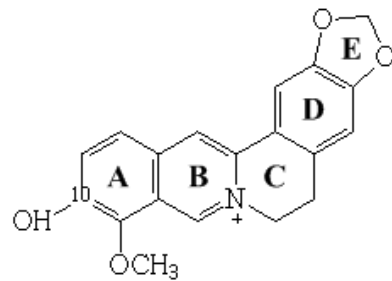

M2: thalifendine

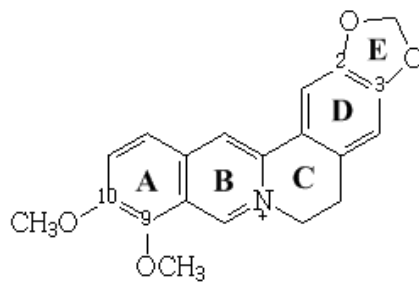

BBR: berberine

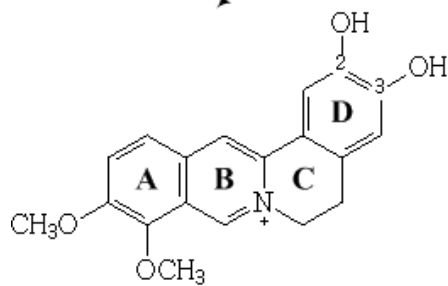

M3: demethyleberberine

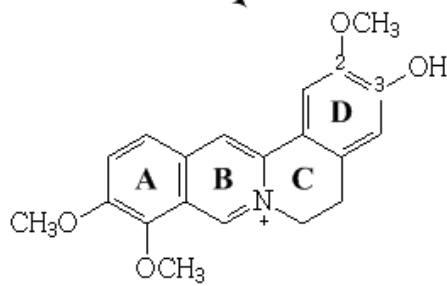

M4: jatrorrhizine

Supplement: MOESM1 [file 9577382]
